# Supplementary material
Source: publisher site journal article supplement (https://jhr.pensoft.net/article/65760/download/suppl/33/)
Supplement: Supplementary file 1

**Appendix III: Species list**

*Z. (Ctenochilus)* de Saussure, 1856 **n. stat.**

NEOTROPICAL

*Z. argentinus* (Brèthes) **n. comb.** (= *Ctenochilus argentinus*)

*Z. bimaculatus* (Zavattari) **n. comb.** (= *Ctenochilus bimaculatus*)

*Z. chilensis* (Giordani Soika) **n. comb.** (= *Ctenochilus chilensis*)

*Z. cuyanus* (Brèthes) **n. comb.** (= *Ctenochilus cuyanus*)

*Z. pilipalpus* (Spinola) **n. comb.** (= *Ctenochilus pilipalpus*)

###### *Zethus* (*Didymogastra*) Perty, 1833 **n. stat.**

NEARCTIC

*Z. orizabae* Bohart & Stange

NEOTROPICAL

*Z. alessandroi* Lopes

*Z. andinus* Brèthes

*Z. caridei* (Brèthes)

*Z. coloratus* Fox

*Z. dicomboda* (Spinola)

*Z. frederickorum* Garcete-Barrett

*Z. giseleae* Hermes & Lopes

*Z. haywardi* Bohart & Stange

*Z. hilarianus* de Saussure

*Z. iheringi* Zavattari

*Z. kaapora* Lopes & Kumagai

*Z. longistylus* Zavattari

*Z. mesocarinatus* Lopes & Hermes

*Z. pamparum* Berg

*Z. peculiaris* Fox

*Z. pontagrossensis* Stange

*Z. porteri* Stange

*Z. scrobalis* Lopes

*Z. simulans* Bohart & Stange

*Z. spegazzinii* (Brèthes)

*Z/ wileyi* Stange

BOTH REGIONS

*Z. fuscus* (Perty)

*Z. miscogaster* de Saussure

*Z. smithii* de Saussure

###### *Zethus* (*Ischnocoelia*) Perkins, 1908 **n. stat.**

AUSTRALIAN

*Z. chloroticus* (Giordani Soika) **n. comb.** (= *Ischnocoelia chlorotica*)

*Z. elongatus* (de Saussure) **n. comb.** (= *Ischnocoelia elongata*)

*Z. exiguus* (Borsato) **n. comb.** (= *Ischnocoelia exigua*)

*Z. fulvus* (von Schultess) **n. comb.** (= *Ischnocoelia fulva*)

*Z. gregoryensis* (Borsato) **n. comb.**

(*= Ischnocoelia gregoryensis*)

*Z. integer* (von Schulthess)**n. comb.**

(= *Ischnocoelia integra*)

*Z. mirabile* (Borsato) **n. comb.** (= *Ischnocoelia mirabile*)

*Z. occidentalis* (Giordani Soika) **n. comb.** (= *Ischnocoelia occidentalis*)

*Z. polychromus* (Giordani Soika) **n. comb.** (= *Ischnocoelia polychroma*)

*Z. robustus* (Meade-Waldo) **n. comb.** (= *Ischnocoelia robusta*)

*Z. rutilus* Lopes, **n. name** (= *Ischnocoelia ferruginea*)

*Z. somniatus* (Borsato) **n. comb.** (= *Ischnocoelia somniata*)

*Z. xanthochromus* (Perkins) **n. comb.** (= *Ischnocoelia xanthochroma*)

*Z. yahwulpa* (Borsato) **n. comb.** (= *Ischnocoelia yahwulpa*)

###### *Zethus* (*Madecazethus*) Giordani Soika, 1979

PALEARTIC

*Z. favillaceus* Walker

AFROTROPICAL

*Z. aethiopicus* Giordani Soika

*Z. bilaminatus* Giordani Soika

*Z. brooksi* Giordani Soika

*Z. delagoensis* von Schulthess

*Z. empeyi* Giordani Soika

*Z. favillaceus* Walker

*Z. guineensis* Gusenleitner

*Z. intermedius* Selis

*Z. madecassus* (von Schulthess)

*Z. namibicus* Gusenleitner

*Z. pubescens* Smith

*Z. rhodesianus* Giordani Soika

*Z. rodhaini* Bequaert

*Z. rothschildianus* (du Buysson)

*Z. senegalensis* Giordani Soika

*Z. seyrigi* Giordani Soika

*Z. yarrow* Giordani Soika

*Zethus* (*Wettsteinia*) Dalla Torre, 1904 **n. stat.**

NEARCTIC

*Z. inornatus* Zavattari

NEOTROPICAL

*Z. adonis* Bohart & Stange

*Z. aliceae* Lopes

*Z. alticola* Bohart & Stange

*Z. angustior* Bohart & Stange

*Z. apicalipennis* Zavattari

*Z. attenuatus* Bohart & Stange

*Z. barbacoas* Cooper

*Z. boharti* Stange

*Z. bolivarensis* Stange

*Z. bryanti* Bohart & Stange

*Z. caetetus* Hermes

*Z. cataractae* Cooper

*Z. cavagneroi* Bohart & Stange

*Z. cerceroides* Zavattari

*Z. charon* Bohart & Stange

*Z. clypeolaris* Bohart & Stange

*Z. cubensis* Zavattari

*Z. dentostipes* Bohart & Stange

*Z. dodgei* Bohart & Stange

*Z. ecuadorae* Bohart & Stange

*Z. ellioti* Stange

*Z. fabricator* Stange

*Z. fergusoni* Bohart & Stange

*Z. flaviventris* Hermes

*Z. fritzi* Stange

*Z. garciai* Bohart & Stange

*Z. gaudens* Zavattari

*Z. harlequinus* Bohart & Stange

*Z. heydeni* de Saussure

*Z. inca* Kirsch

*Z. infelix* Zavattari

*Z. islandicus* Bohart & Stange

*Z. mapiriensis* Bohart & Stange

*Z. melanis* Bohart & Stange

*Z. mimus* Zavattari

*Z. neffi* Stange

*Z. peruvianus* Zavattari

*Z. pilosus* Zavattari

*Z. placidus* Zavattari

*Z. plaumanni* Bohart & Stange

*Z. satanicus* Bohart & Stange

*Z. sichelianus* (de Saussure)

*Z. smidtianus* Garcete-Barrett

*Z. sulcatus* Zavattari

*Z. venezuelanus Zavattari*

*Z. weyrauchi* Bohart & Stange

*Z. woodruffi* Stange

*Z. yepezi* Stange

BOTH REGIONS

*Z. cylindricus* Fox

*Z. evansi* Bohart & Stange

*Z. felix* Zavattari

*Z. gracilis* Smith

*Z. histrionicus* Zavattari

*Z. montezuma* de Saussure

*Z. strigosus* de Saussure

*Zethus* (*Zethastrum*) Lopes **n. subg.**

PALEARCTIC

*Z. asiaticus* Gusenleitner

ORIENTAL

*Z. albopilosus* Giordani Soika

*Z. angulatus* Nguyen & Carpenter

*Z. asperipunctatus* Wang & Li

*Z. bakeri* Giordani Soika

*Z. celebensis* Giordani Soika

*Z. ceylonicus* de Saussure

*Z. dolosus* Bingham

*Z. fulgens* Gusenleitner

*Z. improcerus* Giordani Soika

*Z. indicus* Giordani Soika

*Z. luzonensis* Giordani Soika

*Z. malabaricus* Giordani Soika

*Z. malayanus* Gusenleitner

*Z. mandibularis* Giordani Soika

*Z. nanlingensis* Nguyen & Xu

*Z. nigerrimus* Gusenleitner

*Z. nullimarginatus* Wang & Li

*Z. planiclypeus* Gusenleitner

*Z. propodeus* Nguyen & Carpenter

*Z. quadridentatus* Cameron

*Z. soikai* Selis

*Z. striatus* Wang & Li

*Z. taiwanus* Yeh & Lu

*Z. tansoneus* Nguyen & Carpenter

*Z. trimaculatus* Cameron

*Z tumidus* Nguyen & Carpenter

*Z. varipinctatus* Cameron

*Z. velamellatus* Tan

*Zethus* (*Zethoides*) Fox, 1899

NEARCTIC

*Z. menkei* Bohart & Stange

*Z. oaxacae* Bohart & Stange

NEOTROPICAL

*Z. anomalus* Cooper

*Z. biglumis* Spinola

*Z. binodis* (Fabricius)

*Z. bodkini* Bohart & Stange

*Z. carinatus* Smith

*Z. carpenteri* Stange

*Z. chapadensis* Bohart & Stange

*Z. colombiae* Bohart & Stange

*Z. coriarius* Fox

*Z. denticlypeus*, Lopes

*Z. diminutus* Fox

*Z. haemorrhoidalis* Kriwchbaumer

*Z. inconstans* Fox

*Z. irwini* Bohart & Stange

*Z. lobulatus* de Saussure

*Z. luederwaldti* (von Ihering)

*Z. lunaris* Zavattari

*Z. milleri* Stange

*Z. miniatus* de Saussure

*Z. minimus* Zavattari

*Z. nodosus* Zavattari

*Z. notatus* Fox

*Z. parvulus* de Saussure

*Z. peruvicus* Bohart & Stange

*Z. proximus* Bohart & Stange

*Z. pygmaeus* Zavattari

*Z. rugosiceps* Fox

*Z. schadei* Bohart & Stange

*Z. schlingeri* Bohart & Stange

*Z. thoracicus* Fox

*Z. velezi* Bohart & Stange

*Z. willinki* Bohart & Stange

BOTH REGIONS

*Z. analis* Zavattari

*Z. aztecus* de Saussure

*Z. clypearis* de Saussure

*Z. guerreroi* Zavattari

*Z. matzicatzin* de Saussure

*Z. olmecus* de Saussure

*Z. parkeri* Bohart & Stange

*Z. toltecus* de Saussure

*Z. yucatanae* Bohart & Stange

###### *Zethus* (*Zethus*) Fabricius, 1804

NEARCTIC

*Z. spinipes* Say

NEOTROPICAL

*Z. ajax* Bohart & Stange

*Z. alvarengai* Bohart & Stange

*Z. andesae* Bohart & Stange

*Z. ater* Brèthes

*Z. bequaerti* Bohart & Stange

*Z. bolivianus* Zavattari

*Z. broadi* Cooper

*Z. campanulatus* Fox

*Z. chalybeus* de Saussure

*Z. chimorum* Bohart & Stange

*Z. chrysopterus* de Saussure

*Z. cinerascens* de Saussure

*Z. clavatus* Bohart & Stange

*Z. coeruleopennis* Fabricius

*Z. conicus* Bohart & Stange

*Z. cristatus* Fox

*Z. demissus* Zavattari

*Z. discoelioides* de Saussure

*Z. flavidulus* Bohart & Stange

*Z. flavipons* Bohart & Stange

*Z. fluminensis* Brèthes

*Z. hexagonus* Fox

*Z. huascari* Bohart & Stange

*Z. ibicui* Cooper

*Z. incommodus* Zavattari

*Z. infundibuliformis* Fabricius

*Z. isthmicus* Zavattari

*Z. josefi* Carpenter

*Z. lignicola* Brèthes

*Z. lopezi* Bohart & Stange

*Z. magretti* Zavattari

*Z. neotomitus* Bohart & Stange

*Z. nutans* Zavattari

*Z. orans* Zavattari

*Z. paranensis* Brèthes

*Z. polybioides* Zavattari

*Z. precans* Zavattari

*Z. prominens* Fox

*Z. pronatus* Bohart & Stange

*Z. rossi* Bohart & Stange

*Z. sessilis* Fox

*Z. shannoni* Bohart & Stange

*Z. silvaegrandis* Schulz

*Z. stangei* Porter

*Z. stellaris* Zavattari

*Z. striatifrons* Fox

*Z. umbrosus* Bohart & Stange

*Z. wagneri* Bohart & Stange

BOTH REGIONS

*Z. dreibaschi* Bohart & Stange

*Z. laevinodus* Smith

*Z. otomitus* de Saussure

*Zethus* (*Zethusculus*) de Saussure, 1855

NEARCTIC

*Z. slossonae* Fox

NEOTROPICAL

*Z, arietis* (Fabricius)

*Z. bahamensis* Bequaert & Salt

*Z. brasiliensis* de Saussure

*Z. carbonarius* Smith

*Z. ebenus* Bohart & Stange

*Z. fraternus* de Saussure

*Z. imperfectus* Fox

*Z. jurinei* de Saussure

*Z. magnus* de Saussure

*Z. mexicanus* (Linnaeus)

*Z. mocsaryi* Zavattari

*Z. mutatus* Zavattari

*Z. obscurus* Zavattari

*Z. paschoali* Lopes & Hermes

*Z. poeyi* de Saussure

*Z. pyriformis* Spinola

*Z. romandinus* de Saussure

*Z. rubioi* Stange

*Z. rufinodus* (Latreille)

*Z. schrottkyanus* von Ihering

*Z. torquatus* Zavattari

*Z. vincenti* Stange

*Z. waldoi* Zavattari

BOTH REGIONS

*Z. nigricornis* de Saussure

*Z. westwoodi* de Saussure

*Incertae sedis*

NEARCTIC

*Z. gonostylus* Bohart & Stange

NEOTROPICAL

*Z. alacer* Bohart & Stange

*Z. albopictus* Smith

*Z. alogus* Bohart & Stange

*Z. anisitsii* (Brèthes)

*Z. arotus* Bohart & Stange

*Z. bardus* Bohart & Stange

*Z. caracis* Bohart & Stange

*Z. clio* Bohart & Stange

*Z. corcovadensis* Zavattari

*Z. coroicae* Bohart & Stange

*Z. dubius* Smith

*Z. excavatus* Bohart & Stange

*Z. pallidus* Smith

*Z. productus* Fox

*Z. restrepoicus* Bohart & Stange

*Z. roridus* zavattari

*Z. sculpturalis* Smith

*Z. silvicola* Cooper

*Z. sinuostylus* Lopes

*Z. trispinosus* Zavattari

*Z. schulthessi* Zavattari

BOTH REGIONS

*Z. nicaraguensis* Zavattari

*Z. spinosus* Saussure

*Species dubiae*

*Z. assimilis* (Brèthes)

*Z. didymogaster* Spinola

*Z. holmbergii* Brèthes

*Z. medius* Brèthes

*Z. rufipes* Fox

*Z. scandens* Zavattari
